# Supplementary figures and images for: Transforming growth factor-β-induced lncRNA-Smad7 inhibits apoptosis of mouse breast cancer JygMC(A) cells
Source: PubMed Central journal article supplement — Cancer Sci. 2014 Jul 25;105(8):974–82. doi: 10.1111/cas.12454 (PMC4317863; doi:10.1111/cas.12454), 2014-07-25

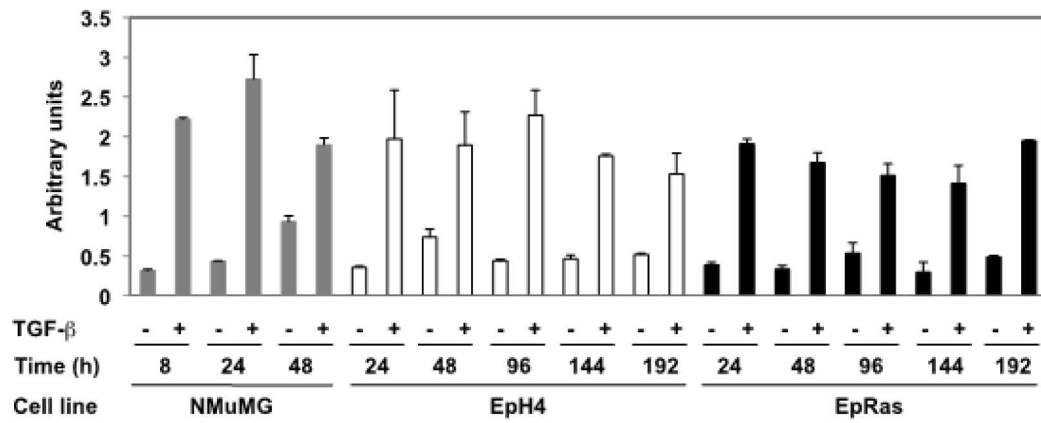

A

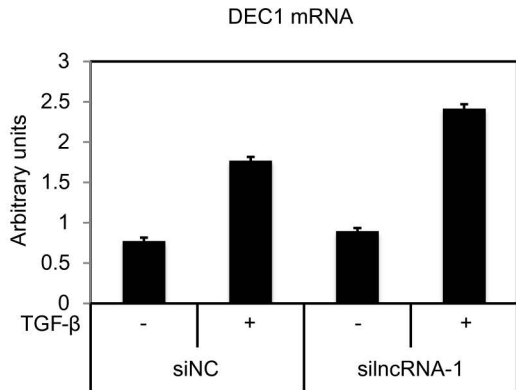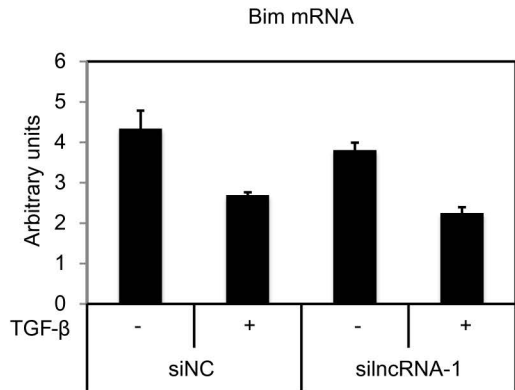

Supplement: cas0105-0974-SD2.pdf [file cas0105-0974-SD2.pdf]
